# Supplementary material for: LSPpred Suite: Tools for Leaderless Secretory Protein Prediction in Plants
Source: Plants (Basel). 2023 Mar 23;12(7):1428. doi: 10.3390/plants12071428 (PMC10097205; doi:10.3390/plants12071428)
Supplement: Supplementary file 1 [file plants-12-01428-s001.zip › LSPpred_paper_v011122_supp_table2.xlsx]

## Sheet: Sheet1
Number	Classification	Category	Sub-category	Accession a	Accession (remove version)	Peptide count b	Peptides quantitation c	Confidence score d	p e	Fold +Mn/C f	Type	Description g	Function h	Domain i	Uniprot entry j	TMHMM k	Category l	Signal peptide prediction m	Secretory prediction n	Reason for lnS o	Reclassification
21	Secretory proteins (CPS + UPS + sUPS; 181 proteins)	Protein metabolism (33 proteins)	Proteolysis (27 proteins)	Solyc03g123730.3.1	Solyc03g123730.3	2	2	85.81	0.000251626	0.351381	Down	26S protease regulatory subunit (AHRD V3.3 *** T2DN87_PHAVU)	proteasome assembly	AAA ATPase family	A0A3Q7FWM7	0	sUPS		SecP		Retained
22	Secretory proteins (CPS + UPS + sUPS; 181 proteins)	Protein metabolism (33 proteins)	Proteolysis (27 proteins)	Solyc01g099760.3.1	Solyc01g099760.3	7	3	265.13	0.00236006	0.23218	Down	LeMA-1 putatve Mg-dependent ATPase 1	protein catabolic process	AAA ATPase family	A0A3Q7F894	0	sUPS		SecP		Retained
23	Secretory proteins (CPS + UPS + sUPS; 181 proteins)	Protein metabolism (33 proteins)	Proteolysis (27 proteins)	Solyc04g079200.3.1	Solyc04g079200.3	5	5	273.66	0.00196265	0.466575	Down	26S proteasome non-ATPase regulatory subunit, putative (AHRD V3.3 *** B9R7G0_RICCO)	proteolysis	MEROPS identifier M67.001	A0A3Q7GAC5	0	sUPS		SecP		Retained
28	Secretory proteins (CPS + UPS + sUPS; 181 proteins)	Protein metabolism (33 proteins)	Protein synthesis (6 proteins)	Solyc03g115360.3.1	Solyc03g115360.3	8	3	323.59	0.00288062	0.369771	Down	40S ribosomal protein S19-like (AHRD V3.3 *** Q2VCJ6_SOLTU)	structural constituent of ribosome	IPR001266﻿, Ribosomal_S19e	A0A3Q7FTS1	0	sUPS		SecP		Retained
29	Secretory proteins (CPS + UPS + sUPS; 181 proteins)	Protein metabolism (33 proteins)	Protein synthesis (6 proteins)	Solyc06g008170.3.1	Solyc06g008170.3	2	2	153.17	0.0015667	0.0887714	Down	50S ribosomal protein L14 (AHRD V3.3 *** A0A0K9PMD0_ZOSMR)	structural constituent of ribosome	IPR036853﻿, Ribosomal_L14_sf	K4CUW3	0	sUPS		SecP		Retained
189	Likely non-secretory proteins (lnS; 43 proteins)			Solyc01g009100.3.1	Solyc01g009100.3	2	2	97.71	0.018727	0.459905	Down	60S ribosomal protein L30 (AHRD V3.3 *** RL30_LUPLU)			A0A3Q7E9D6	0	lnS		None		Low confidence
190	Likely non-secretory proteins (lnS; 43 proteins)			Solyc01g060085.1.1	Solyc01g060085.1	2	2	105.33	0.000642737	0.147805	Down	Ribulose bisphosphate carboxylase large chain (AHRD V3.3 *-* RBL_LAVLA)			A0A3Q7EEI8	0	lnS		None		Low confidence
32	Secretory proteins (CPS + UPS + sUPS; 181 proteins)	Protein metabolism (33 proteins)	Protein synthesis (6 proteins)	Solyc12g039120.2.1	Solyc12g039120.2	7	2	251.92	0.00242561	0.341654	Down	40S ribosomal protein S19-like (AHRD V3.3 *** Q2VCJ6_SOLTU)	structural constituent of ribosome	IPR001266﻿, Ribosomal_S19e	A0A3Q7J8R5	0	sUPS		SecP		Retained
38	Secretory proteins (CPS + UPS + sUPS; 181 proteins)	Oxido-reductases (33 proteins)	Peroxidases (7 proteins)	Solyc04g074640.3.1	Solyc04g074640.3	5	5	341.13	0.00325558	0.376715	Down	Ascorbate peroxidase (AHRD V3.3 *** W8E036_JATCU)	response to oxidative stress	Classical plant (class III) peroxidase subfamily/AtPrx07	A0A3Q7H0B7	0	sUPS		SecP		Retained
191	Likely non-secretory proteins (lnS; 43 proteins)			Solyc01g060470.3.1	Solyc01g060470.3	5	3	234.68	0.0164211	0.454799	Down	Importin subunit alpha (AHRD V3.3 *** K4AWF0_SOLLC)			A0A3Q7EFC3	0	lnS		None		Low confidence
59	Secretory proteins (CPS + UPS + sUPS; 181 proteins)	Oxido-reductases (33 proteins)	Miscellaneous Oxido-reductases (12 proteins)	Solyc06g083690.3.1	Solyc06g083690.3	2	2	66.41	0.000246473	0.290187	Down	Glutaredoxin family protein (AHRD V3.3 *** AT4G28730.1)	oxidation-reduction process	IPR002109﻿, Glutaredoxin	A0A3Q7H1V8	0	sUPS		SecP		Retained
61	Secretory proteins (CPS + UPS + sUPS; 181 proteins)	Oxido-reductases (33 proteins)	Miscellaneous Oxido-reductases (12 proteins)	Solyc06g049080.3.1	Solyc06g049080.3	3	3	207.87	0.000262819	0.484068	Down	Thioredoxin peroxidase 1	removal of superoxide radicals	IPR001189﻿, Mn/Fe_SOD	A0A3Q7GSL2	0	sUPS		SecP		Retained
64	Secretory proteins (CPS + UPS + sUPS; 181 proteins)	Oxido-reductases (33 proteins)	Miscellaneous Oxido-reductases (12 proteins)	Solyc10g005110.3.1	Solyc10g005110.3	3	3	113.12	3.40278e-05	0.307757	Down	Coproporphyrinogen III oxidase (AHRD V3.3 *** AT1G03475.1)	porphyrin-containing compound biosynthetic process	IPR001260﻿, Coprogen_oxidase_aer	A0A3Q7I9A2	0	sUPS		SecP		Retained
70	Secretory proteins (CPS + UPS + sUPS; 181 proteins)	Polysaccharide metabolism (26 proteins)	-	Solyc04g077190.3.1	Solyc04g077190.3	13	11	833.02	0.00181813	0.359805	Down	Endo-1,4-beta-xylanase A (AHRD V3.3 *** A0A0B2QB53_GLYSO)	carbohydrate metabolic process	IPR001000﻿, GH10	A0A3Q7G9I3	0	sUPS		SecP		Retained
108	Secretory proteins (CPS + UPS + sUPS; 181 proteins)	Carbohydrate process (22 proteins)	-	Solyc03g121720.2.1	Solyc03g121720.2	4	4	192.51	0.0109848	0.335246	Down	3-hydroxyisobutyrate dehydrogenase, putative (AHRD V3.3 *** B9S5X5_RICCO)	pentose-phosphate shunt	IPR008927﻿, 6-PGluconate_DH-like_C_sf	-	0	sUPS		SecP		Retained
109	Secretory proteins (CPS + UPS + sUPS; 181 proteins)	Carbohydrate process (22 proteins)	-	Solyc01g058390.3.1	Solyc01g058390.3	2	2	106.13	0.00899288	0.0696779	Down	Galactokinase, putative (AHRD V3.3 *** B9RZT4_RICCO)	galactose metabolic process		A0A3Q7EEN4	0	sUPS		SecP		Retained
113	Secretory proteins (CPS + UPS + sUPS; 181 proteins)	Carbohydrate process (22 proteins)	-	Solyc08g080140.3.1	Solyc08g080140.3	4	2	251.22	0.00243088	0.268836	Down	3,5-epimerase/4-reductase (AHRD V3.3 *** I3SMF8_MEDTR)	dTDP-rhamnose biosynthetic process	IPR029903﻿, RmlD-like-bd	A0A3Q7HT77	0	sUPS		SecP		Retained
129	Secretory proteins (CPS + UPS + sUPS; 181 proteins)	Signalling/regulation (16 proteins)	-	Solyc08g076960.1.1	Solyc08g076960.1	6	4	269.46	3.19092e-05	0.269196	Down	Abscisic acid receptor PYL1 (AHRD V3.3 *** M1BH64_SOLTU)	abscisic acid-activated signaling pathway	IPR019587. Polyketide_cyclase/dehydratase	A0A3Q7HTY9	0	sUPS		SecP		Retained
143	Secretory proteins (CPS + UPS + sUPS; 181 proteins)	Lipid metabolism (13 proteins)	-	Solyc01g105060.3.1	Solyc01g105060.3	2	2	74.79	3.17502e-06	0.179059	Down	Beta-hydroxyacyl-ACP dehydratase (AHRD V3.3 *** F2VYC9_HELAN)	fatty acid biosynthetic process	IPR013114﻿, FabA_FabZ	A0A3Q7ER18	0	sUPS		SecP		Retained
192	Likely non-secretory proteins (lnS; 43 proteins)			Solyc01g103800.3.1	Solyc01g103800.3	2	2	82.24	0.000323586	0.0830186	Down	40S ribosomal protein S12 (AHRD V3.3 *** K4B1V5_SOLLC)			A0A3Q7FAA3	0	lnS		None		Low confidence
193	Likely non-secretory proteins (lnS; 43 proteins)			Solyc01g109660.2.1	Solyc01g109660.2	6	5	326.39	4.91454e-05	0.277084	Down	Meloidogyne-induced giant cell protein DB275			K4B3H9	0	lnS		None		Low confidence
166	Secretory proteins (CPS + UPS + sUPS; 181 proteins)	Miscellaneous (24 proteins)	Other (12 proteins)	Solyc02g094200.3.1	Solyc02g094200.3	2	2	114.86	2.23986e-07	0.202957	Down	Nuclear transport factor 2 (AHRD V3.3 *** NTF2_ARATH)	protein import into nucleus	IPR002075﻿, NTF2	A0A3Q7FC69	0	sUPS		SecP		Retained
169	Secretory proteins (CPS + UPS + sUPS; 181 proteins)	Miscellaneous (24 proteins)	Other (12 proteins)	Solyc03g080180.3.1	Solyc03g080180.3	6	5	228.79	0.00358095	0.213642	Down	Caffeic acid O-methyltransferase (AHRD V3.3 *** A0A0G4DCV8_CAPCH)	aromatic compound biosynthetic process	IPR029063﻿, SAM-dependent_MTases	A0A3Q7G9H2	0	sUPS		SecP		Retained
170	Secretory proteins (CPS + UPS + sUPS; 181 proteins)	Miscellaneous (24 proteins)	Other (12 proteins)	Solyc06g005360.3.1	Solyc06g005360.3	7	3	363.45	1.45384e-06	0.0759674	Down	Actin-depolymerizing factor family protein (AHRD V3.3 *** B9HPK1_POPTR)	actin filament depolymerization	IPR002108﻿, ADF-H	A0A3Q7GNQ9	0	sUPS		SecP		Retained
171	Secretory proteins (CPS + UPS + sUPS; 181 proteins)	Miscellaneous (24 proteins)	Other (12 proteins)	Solyc07g064160.3.1	Solyc07g064160.3	2	2	68.18	0.000193585	0.0822155	Down	Thiamine thiazole synthase, chloroplastic (AHRD V3.3 *** K4CH99_SOLLC)	thiamine biosynthetic process	IPR002922﻿, Thi4_fam	A0A3Q7HFB9	0	sUPS		SecP		Retained
194	Likely non-secretory proteins (lnS; 43 proteins)			Solyc02g023970.3.1	Solyc02g023970.3	2	2	84.8	0.000510034	0.2669	Down	Obg-like ATPase 1 (AHRD V3.3 *** K4B546_SOLLC)			A0A3Q7EY39	0	lnS		None		Low confidence
195	Likely non-secretory proteins (lnS; 43 proteins)			Solyc02g069080.3.1	Solyc02g069080.3	2	2	93.75	0.00139954	0.53098	Down	Exocyst complex component 8 (AHRD V3.3 *** A0A0B0NCJ4_GOSAR)			A0A3Q7F171	0	lnS		None		Low confidence
196	Likely non-secretory proteins (lnS; 43 proteins)			Solyc02g078540.3.1	Solyc02g078540.3	3	2	111.98	0.0005432	0.397334	Down	Clathrin light chain (AHRD V3.3 *** A0A103XF03_CYNCS)			A0A3Q7F4L8	0	lnS		None		Low confidence
197	Likely non-secretory proteins (lnS; 43 proteins)			Solyc02g082760.3.1	Solyc02g082760.3	8	4	352.66	2.00732e-05	0.267088	Down	Ethylene-responsive catalase			K4BAE6	0	lnS		None		Low confidence
198	Likely non-secretory proteins (lnS; 43 proteins)			Solyc02g084920.3.1	Solyc02g084920.3	7	5	397.12	0.0106458	0.544191	Down	Fruit-specific protein TOM2A11			K4BB06	0	lnS		None		Low confidence
199	Likely non-secretory proteins (lnS; 43 proteins)			Solyc04g008280.2.1	Solyc04g008280.2	7	4	388.21	6.69965e-09	0.210847	Down	4-hydroxy-4-methyl-2-oxoglutarate aldolase (AHRD V3.3 *** K4BNY4_SOLLC)			K4BNY4	0	lnS		None		Low confidence
200	Likely non-secretory proteins (lnS; 43 proteins)			Solyc04g011400.3.1	Solyc04g011400.3	19	8	1240.51	0.000137858	0.243662	Down	UDP-glucuronate decarboxylase 1 (AHRD V3.3 *** Q6IVK5_TOBAC)			A0A3Q7FZG5	0	lnS		None		Low confidence
201	Likely non-secretory proteins (lnS; 43 proteins)			Solyc04g015830.3.1	Solyc04g015830.3	8	4	429.21	8.44386e-05	0.507197	Down	Villin 2 (AHRD V3.3 *** AT2G41740.2)			A0A3Q7GSF7	0	lnS		None		Low confidence
202	Likely non-secretory proteins (lnS; 43 proteins)			Solyc04g081490.3.1	Solyc04g081490.3	6	3	295.26	0.00148478	0.162605	Down	Beta-tubulin			Q38MV0	0	lnS		None		Low confidence
203	Likely non-secretory proteins (lnS; 43 proteins)			Solyc05g018570.3.1	Solyc05g018570.3	3	2	128.79	0.0370181	0.147918	Down	26S protease regulatory subunit, putative (AHRD V3.3 *** B9STQ0_RICCO)			A0A3Q7GJQ1	0	lnS		None		Low confidence
205	Likely non-secretory proteins (lnS; 43 proteins)			Solyc06g083620.3.1	Solyc06g083620.3	6	6	258.4	9.73512e-06	0.0982751	Down	26S protease regulatory subunit (AHRD V3.3 *** A0A199VGJ0_ANACO)			A0A3Q7HYJ1	0	lnS		None		Low confidence
206	Likely non-secretory proteins (lnS; 43 proteins)			Solyc06g083810.3.1	Solyc06g083810.3	2	2	61.67	0.00234413	0.400203	Down	Glycolipid transfer protein domain-containing protein (AHRD V3.3 *** A0A103Y7C8_CYNCS)			A0A3Q7H546	0	lnS		None		Low confidence
207	Likely non-secretory proteins (lnS; 43 proteins)			Solyc07g006790.3.1	Solyc07g006790.3	7	7	255.63	0.00210617	0.494194	Down	Acetyltransferase component of pyruvate dehydrogenase complex (AHRD V3.3 *** K4CBF0_SOLLC)			A0A3Q7H441	0	lnS		None		Low confidence
208	Likely non-secretory proteins (lnS; 43 proteins)			Solyc07g042520.3.1	Solyc07g042520.3	17	10	746.45	0.000305552	0.12419	Down	Sucrose synthase (AHRD V3.3 *** M1B219_SOLTU)			A0A3Q7I629	0	lnS		None		Low confidence
209	Likely non-secretory proteins (lnS; 43 proteins)			Solyc07g052480.3.1	Solyc07g052480.3	27	27	1697.76	0.00359242	0.365654	Down	Isocitrate lyase LEU18678			-	0	lnS		None		Low confidence
211	Likely non-secretory proteins (lnS; 43 proteins)			Solyc08g074683.1.1	Solyc08g074683.1	4	4	143.66	0.000569512	0.376073	Down	Polyphenol oxidase precursor			-	0	lnS		None		Low confidence
212	Likely non-secretory proteins (lnS; 43 proteins)			Solyc08g079060.3.1	Solyc08g079060.3	3	2	130.13	0.00203762	0.533308	Down	Trehalose 6-phosphate phosphatase (AHRD V3.3 *** K4CNR5_SOLLC)			A0A3Q7HV25	0	lnS		None		Low confidence
214	Likely non-secretory proteins (lnS; 43 proteins)			Solyc10g005670.2.1	Solyc10g005670.2	8	6	445.01	7.26182e-08	0.312316	Down	4-hydroxy-4-methyl-2-oxoglutarate aldolase (AHRD V3.3 *** M1ASF0_SOLTU)			A0A3Q7I9Q3	0	lnS		None		Low confidence
215	Likely non-secretory proteins (lnS; 43 proteins)			Solyc11g005420.2.1	Solyc11g005420.2	3	3	93.81	0.000154341	0.256843	Down	NF-180 (AHRD V3.3 --* B6TUT1_MAIZE)			A0A3Q7INI5	0	lnS		None		Low confidence
216	Likely non-secretory proteins (lnS; 43 proteins)			Solyc12g094620.2.1	Solyc12g094620.2	28	24	1681.18	4.22922e-06	0.152106	Down	Catalase			A0A3Q7JD73	0	lnS		None		Low confidence
217	Likely non-secretory proteins (lnS; 43 proteins)			Solyc12g098150.2.1	Solyc12g098150.2	8	8	346.8	0.00044586	0.243818	Down	Aldo/keto reductase (AHRD V3.3 *** A0A103Y0I1_CYNCS)			A0A3Q7JD46	0	lnS		None		Low confidence
83	Likely non-secretory proteins (lnS; 16 proteins)			Solyc01g102660.3.1	Solyc01g102660.3	2	2	76.89	0.000454002	2.879	Up	Glutathione S-transferase (AHRD V3.3 *** A5YRT3_CAPAN)			A0A3Q7EQY6	0	lnS		None		Low confidence
89	Likely non-secretory proteins (lnS; 16 proteins)			Solyc06g005260.3.1	Solyc06g005260.3	3	2	167.58	3.7315e-05	3.0418	Up	Glutaredoxin (AHRD V3.3 *** GLRX_SOLLC)			A0A3Q7GRA7	0	lnS		None		Low confidence
90	Likely non-secretory proteins (lnS; 16 proteins)			Solyc07g008240.3.1	Solyc07g008240.3	6	5	181.39	0.000323567	3.51374	Up	Non-symbiotic hemoglobin 1 (AHRD V3.3 *** HBL1_GOSHI)			Q9AWA9	0	lnS		None		Low confidence
92	Likely non-secretory proteins (lnS; 16 proteins)			Solyc09g091000.3.1	Solyc09g091000.3	12	11	827.48	7.93836e-08	54.3294	Up	Major allergen d 1 (AHRD V3.3 *** Q8L6K9_MALDO)			A0A3Q7I801	0	lnS		None		Low confidence
93	Likely non-secretory proteins (lnS; 16 proteins)			Solyc10g084400.2.1	Solyc10g084400.2	4	4	172.34	0.000201648	4.44135	Up	Glutathione S-transferase family protein (AHRD V3.3 *** AT5G02790.1)			-	0	lnS		None		Low confidence
94	Likely non-secretory proteins (lnS; 16 proteins)			Solyc11g007020.2.1	Solyc11g007020.2	4	3	211.59	2.7421e-05	6.23136	Up	Mevalonate disphosphate decarboxylase			A8WBX7	0	lnS		None		Low confidence
95	Likely non-secretory proteins (lnS; 16 proteins)			Solyc12g014380.2.1	Solyc12g014380.2	3	3	110.23	0.000750541	2.6962	Up	Glucose-6-phosphate isomerase DQ451687			A0A3Q7J5N2	0	lnS		None		Low confidence
96	Likely non-secretory proteins (lnS; 16 proteins)			Solyc12g043110.2.1	Solyc12g043110.2	12	2	527.69	0.00797855	2.25183	Up	LETSW12			A0A3Q7JW47	0	lnS		None		Low confidence
97	Likely non-secretory proteins (lnS; 16 proteins)			Solyc12g056230.2.1	Solyc12g056230.2	3	3	71.46	0.00974361	3.81102	Up	Glutathione peroxidase like encoding 2			-	0	lnS		None		Low confidence
30	Secretory proteins (CPS + UPS + sUPS; 181 proteins)	Protein metabolism (33 proteins)	Protein synthesis (6 proteins)	Solyc06g073310.3.1	Solyc06g073310.3	3	3	135.77	0.00709361	0.446612	Down	60S ribosomal protein l9 (AHRD V3.3 *** E5GBD5_CUCME)	structural constituent of ribosome	IPR000702﻿, Ribosomal_L6	A0A3Q7GZX3	0	sUPS		SecP		Not kept
31	Secretory proteins (CPS + UPS + sUPS; 181 proteins)	Protein metabolism (33 proteins)	Protein synthesis (6 proteins)	Solyc09g066430.3.1	Solyc09g066430.3	3	2	73.69	0.0149643	0.0886738	Down	60S ribosomal protein L14, putative (AHRD V3.3 *** B9SV21_RICCO)	structural constituent of ribosome	IPR002784﻿, Ribosomal_L14e_dom	A0A3Q7J0J5	0	sUPS		SecP		Not kept
56	Secretory proteins (CPS + UPS + sUPS; 181 proteins)	Oxido-reductases (33 proteins)	Miscellaneous Oxido-reductases (12 proteins)	Solyc02g087230.3.1	Solyc02g087230.3	2	2	43.29	0.000555522	0.301644	Down	Ferredoxin-thioredoxin reductase catalytic chain (AHRD V3.3 *** W9SEM5_9ROSA)	oxidation-reduction process	IPR004209﻿, FTR_bsu	A0A3Q7FAK2	0	sUPS		SecP		Not kept
149	Secretory proteins (CPS + UPS + sUPS; 181 proteins)	Defense (6 proteins)	-	Solyc01g010750.3.1	Solyc01g010750.3	3	3	205.9	2.36386e-07	0.269943	Down	Hop-interacting protein THI113 (AHRD V3.3 *** G8Z279_SOLLC)	stomatal closure/defense response to bacterium	IPR035992 Ricin_B-like_lectins	A0A3Q7EB31	0	sUPS		SecP		Not kept
165	Secretory proteins (CPS + UPS + sUPS; 181 proteins)	Miscellaneous (24 proteins)	Other (12 proteins)	Solyc04g049330.3.1	Solyc04g049330.3	4	2	258.8	0.000617422	0.349531	Down	V-type proton ATPase subunit G (AHRD V3.3 *** A0A0B2RXB3_GLYSO)	ATP hydrolysis coupled proton transport	IPR005124﻿, V-ATPase_G	A0A3Q7G327	0	sUPS		SecP		Not kept
176	Secretory proteins (CPS + UPS + sUPS; 181 proteins)	Unknown function (8 proteins)	-	Solyc06g035920.3.1	Solyc06g035920.3	4	4	162.53	6.94305e-05	0.131533	Down	Remorin (AHRD V3.3 *** REMO_SOLTU)	Unknown	IPR005516﻿, Remorin_C	A0A3Q7GU06	0	sUPS		SecP		Not kept
35	Secretory proteins (CPS + UPS + sUPS; 82 proteins)	Oxido-reductases (16 proteins)	Miscellaneous Oxido-reductases (4 proteins)	Solyc01g008550.4.1	Solyc01g008550.4	5	3	226.13	8.21228e-05	3.30197	Up	Phenylacetaldehyde reductase PAR2	oxidation-reduction process	IPR036291 NAD(P)-bd_dom_sf/IPR001509 Epimerase_deHydtase	-	0	sUPS		SecP		Retained
47	Secretory proteins (CPS + UPS + sUPS; 82 proteins)	Protein metabolism (13 proteins)	Protein synthesis (2 proteins)	Solyc11g072190.2.1	Solyc11g072190.2	10	7	594.1	0.00739353	2.26735	Up	Elongation factor 1-beta', putative (AHRD V3.3 *** Q6L4C2_SOLDE)	translation	IPR001326. Transl_elong_EF1B_B/D_CS/IPR010987. Glutathione-S-Trfase_C-like	A0A3Q7JQE3	0	sUPS		SecP		Retained
71	Secretory proteins (CPS + UPS + sUPS; 82 proteins)	Lipid metabolism (5 proteins)	-	Solyc09g075670.1.1	Solyc09g075670.1	6	6	358.82	5.48327e-05	3.00047	Up	Alpha/beta-Hydrolases superfamily protein (AHRD V3.3 *** A0A061EKQ6_THECC)/ Gibberellin receptor GID1L2 (AHRD V1 **-- B6TIA5_MAIZE); contains Interpro domain(s) IPR013094 Alpha/beta hydrolase fold-3	carboxylesterase activity	IPR013094 Alpha/beta hydrolase fold-3	-	0	sUPS		SecP		Retained
78	Secretory proteins (CPS + UPS + sUPS; 82 proteins)	Miscellaneous (8 proteins)	Amino acid metabolism (6 proteins)	Solyc03g123610.3.1	Solyc03g123610.3	3	2	132.97	0.00660272	3.75036	Up	Alanine aminotransferase 2 (AHRD V3.3 *** AT1G72330.1)	Major alanine aminotransferase in roots/L-alanine catabolic process, by transamination/response to hypoxia and cadmiun ion	IPR004839 Aminotransferase_I/II/IPR015424 PyrdxlP-dep_Trfase	A0A3Q7FWB5	0	sUPS		SecP		Not kept
82	Secretory proteins (CPS + UPS + sUPS; 82 proteins)	Miscellaneous (8 proteins)	Other (1 proteins)	Solyc06g065270.3.1	Solyc06g065270.3	2	2	67.62	1.28472e-06	4.47897	Up	Adenylate kinase (AHRD V3.3 *** G7JRB1_MEDTR)	nucleotide metabolic process	IPR006259﻿, Adenyl_kin_sub	A0A3Q7GWK3	0	sUPS		SecP		Retained
183	Likely non-secretory proteins (lnS; 43 proteins)			Solyc08g013670.3.1	Solyc08g013670.3	3	2	160.32	0.000138	0.176626	Down	Photosystem I reaction center subunit	photosynthesis		A0A3Q7IFE9	0	lnS		SecP	Chloroplast	Not kept (adj)
182	Likely non-secretory proteins (lnS; 43 proteins)			Solyc06g054260.1.1	Solyc06g054260.1	6	5	249.39	0.000117094	0.413014	Down	Photosystem 1 reaction center protein subunit 2	photosynthesis		P12372	0	lnS		SecP	Chloroplast	Retained (adj)
184	Likely non-secretory proteins (lnS; 43 proteins)			Solyc09g063130.3.1	Solyc09g063130.3	4	2	239.81	0.0462282	0.117848	Down	Photosystem I reaction center subunit IV (AHRD V3.3 *** A0A0K9P6J8_ZOSMR)	photosynthesis		A0A3Q7I593	0	lnS		SecP	Chloroplast	Retained (adj)
185	Likely non-secretory proteins (lnS; 43 proteins)			Solyc05g056050.3.1	Solyc05g056050.3	2	2	63.66	0.0252469	0.379753	Down	Chlorophyll a-b binding protein, chloroplastic (AHRD V3.3 *** K4C2T0_SOLLC)	photosynthesis, light harvesting		A0A3Q7GQW0	0	lnS		SecP	Chloroplast	Retained (adj)
186	Likely non-secretory proteins (lnS; 43 proteins)			Solyc02g077860.1.1	Solyc02g077860.1	2	2	98.65	2.90401e-05	0.0535897	Down	Ribulose bisphosphate carboxylase large chain (AHRD V3.3 *-* RBL_PERAE)	carbon fixation		K4B911	0	lnS		SecP	Chloroplast	Retained (adj)
187	Likely non-secretory proteins (lnS; 43 proteins)			Solyc10g047430.1.1	Solyc10g047430.1	3	3	185.31	0.000160933	0.126419	Down	Ribulose bisphosphate carboxylase large chain (AHRD V3.3 *-* Q6SSH3_9SPER)	carbon fixation		-	0	lnS		SecP	Chloroplast	Retained (adj)
204	Likely non-secretory proteins (lnS; 43 proteins)			Solyc06g082120.3.1	Solyc06g082120.3	2	2	76.78	2.32141e-05	0.150458	Down	RAN binding protein 1 (AHRD V3.3 *-* AT5G58590.1)			A0A3Q7H113	0	lnS		None		Unchanged
210	Likely non-secretory proteins (lnS; 43 proteins)			Solyc08g008210.3.1	Solyc08g008210.3	9	2	368.7	1.8306e-05	0.273498	Down	Vacuolar proton ATPase subunit E			A0A3Q7HKZ6	0	lnS		None		Unchanged
213	Likely non-secretory proteins (lnS; 43 proteins)			Solyc10g005100.3.1	Solyc10g005100.3	6	6	288.02	2.20458e-05	0.0720662	Down	Plasma-membrane associated cation-binding protein 1 (AHRD V3.3 *** AT4G20260.6)			A0A3Q7IAT1	0	lnS		None		Unchanged
84	Likely non-secretory proteins (lnS; 16 proteins)			Solyc02g063070.3.1	Solyc02g063070.3	13	5	761.34	0.000465557	3.09853	Up	tft4			A0A3Q7EZ16	0	lnS		None		Unchanged
85	Likely non-secretory proteins (lnS; 16 proteins)			Solyc02g078650.3.1	Solyc02g078650.3	4	4	186.76	0.00017717	4.49581	Up	Polyphenol oxidase (AHRD V3.3 *** A0A118JXA6_CYNCS)			A0A3Q7F625	1	lnS		None		Unchanged
86	Likely non-secretory proteins (lnS; 16 proteins)			Solyc04g055170.3.1	Solyc04g055170.3	11	10	500.66	0.0053487	2.45415	Up	Annexin p35			A0A3Q7G528	0	lnS		None		Unchanged
87	Likely non-secretory proteins (lnS; 16 proteins)			Solyc04g071610.3.1	Solyc04g071610.3	3	3	178.69	9.17773e-07	11.9339	Up	Abscicic acid stress ripening 1			O82575	0	lnS		None		Unchanged
88	Likely non-secretory proteins (lnS; 16 proteins)			Solyc04g076060.3.1	Solyc04g076060.3	10	4	446.33	2.1294e-05	4.88336	Up	tft10			A0A3Q7H0L3	0	lnS		None		Unchanged
91	Likely non-secretory proteins (lnS; 16 proteins)			Solyc09g090430.3.1	Solyc09g090430.3	5	5	252.33	8.09285e-06	3.38858	Up	Cyanate hydratase (AHRD V3.3 *** M1BFS5_SOLTU)			A0A3Q7I962	0	lnS		None		Unchanged
